# Supplementary material for: Piglet Gut and in-Barn Manure from Farms on a Raised without Antibiotics Program Display Reduced Antimicrobial Resistance but an Increased Prevalence of Pathogens
Source: MDPI journal article supplement (doi:10.3390/antibiotics10101152), 2021-09-24
Supplement: s1 [file s1]

**Table S1.** Summary of the number of piglets, type and quantity of antibiotics, and reasons for piglet antibiotic treatments in the participating barns.

| Numbers of piglets         | Type of antibiotics | Reason for treatment |         |           |            |             |           | Quantity of antibiotics used |                  |
|----------------------------|---------------------|----------------------|---------|-----------|------------|-------------|-----------|------------------------------|------------------|
|                            |                     | Infection            | Injury  | Limping   | Poor-doers | Respiratory | Scours    | mg                           | percent/ty<br>pe |
| Non-RWA                    |                     |                      |         |           |            |             |           |                              |                  |
| Piglets<br>(N=14,312)      | Antifolates         | 19,176               | 84,408  | 1,511,155 | 144,000    | 102,450     | 1,516,238 | 3,377,428                    | 64%              |
|                            | β-lactams           | 343,770              | 1,058   | 95,645    | 6,920      | 18,993      | 119,860   | 586,245                      | 11%              |
|                            | Tetracycline        | 0                    | 600     | 2,000     | 5,700      | 300         | 1,322,540 | 1,331,140                    | 25%              |
| Total antibiotics (mg)     |                     | 1,608,800            |         |           |            |             |           | 5,294,813                    |                  |
| Antibiotics percent/reason |                     | 362,946              | 86,066  | 0         | 156,620    | 121,743     | 2,958,638 |                              |                  |
|                            |                     | 7%                   | 2%      | 30%       | 3%         | 2%          | 56%       |                              |                  |
| RWA                        |                     |                      |         |           |            |             |           |                              |                  |
| Piglets<br>(N=1,697)       | Antifolates         | 3,936                | 22,020  | 193,524   | 33,108     | 516         | 2,880     | 255,984                      | 30%              |
|                            | β-lactams           | 81,770               | 245,685 | 130,820   | 1,275      | 900         | 1,800     | 462,250                      | 54%              |
|                            | Chloramphenicol     | 6,075                | 5,175   | 98,700    | 900        | 0           | 0         | 110,850                      | 13%              |
|                            | Tetracycline        | 1,600                | 16,350  | 11,950    | 1,100      | 750         | 0         | 31,750                       | 4%               |
| Total antibiotics (mg)     |                     | 93,381               | 289,230 | 434,994   | 36,383     | 2,166       | 4,680     | 860,834                      |                  |
| Antibiotics percent/reason |                     | 11%                  | 34%     | 51%       | 4%         | 0%          | 1%        |                              |                  |



|                   |                             |                                                   |                                    |                          |        |        |         |        |        |        |        |        |         |        |       |
|-------------------|-----------------------------|---------------------------------------------------|------------------------------------|--------------------------|--------|--------|---------|--------|--------|--------|--------|--------|---------|--------|-------|
| Firmicutes        | Bacilli                     | Streptococcus caballi DSM 19004                   | RG2                                | RG2                      | 0      | 3297   | 0       | 0      | 0      | 0      | 3297   | 0      | 0       | 0      |       |
|                   |                             | Streptococcus gallolyticus subsp. gallolyticus    | RG2                                | RG2                      | 0      | 7478   | 2495    | 3264   | 1031   | 163    | 7478   | 2001   | 8631    | 92     |       |
|                   |                             | Streptococcus equinus JB1                         | RG2                                | RG2                      | 0      | 8524   | 1291    | 3336   | 1185   | 1391   | 8524   | 5277   | 13617   | 0      |       |
|                   |                             | Streptococcus equi subsp. zooepidemicus BHS5      | RG2                                | RG2                      | 0      | 2137   | 3279    | 830    | 677    | 689    | 2137   | 0      | 733     | 647    |       |
|                   |                             | Streptococcus agalactiae                          | RG2                                | RG2                      | 196    | 138    | 385     | 73     | 126    | 101    | 138    | 22     | 82      | 0      |       |
|                   |                             | Streptococcus infantarius subsp. infantarius      | RG1                                | RG2                      | 171    | 2434   | 841     | 1755   | 380    | 273    | 2434   | 1190   | 5447    | 483    |       |
|                   |                             | Streptococcus lutetiensis 033                     | RG2                                | RG2                      | 991    | 33886  | 12325   | 16173  | 5716   | 2663   | 33886  | 11261  | 50561   | 3174   |       |
|                   |                             | Streptococcus parauberis                          | RG1                                | RG2                      | 0      | 399    | 0       | 0      | 0      | 0      | 399    | 0      | 0       | 0      |       |
|                   |                             | Streptococcus pneumoniae 1488                     | RG2                                | RG2                      | 0      | 0      | 0       | 0      | 0      | 0      | 0      | 0      | 0       | 0      |       |
|                   |                             | Streptococcus pasteurianus ATCC 43144             | RG2                                | RG2                      | 0      | 1165   | 499     | 541    | 0      | 0      | 1165   | 0      | 0       | 0      |       |
|                   |                             | Streptococcus suis GZ1                            | RG2                                | RG2                      | 5213   | 5101   | 11869   | 9887   | 5740   | 3595   | 5101   | 5420   | 1966    | 1986   |       |
|                   | Tissierellia                | Anaerococcus prevotii                             | RG2                                | RG1                      | 0      | 13     | 0       | 0      | 0      | 0      | 13     | 0      | 0       | 0      |       |
|                   |                             | Finegoldia magna                                  | RG2                                | RG2                      | 0      | 82     | 0       | 0      | 0      | 0      | 82     | 0      | 0       | 0      |       |
|                   | Clostridia                  | Erysipelothrix rhusiopathiae                      | RG2                                | RG2                      | 0      | 92     | 0       | 0      | 0      | 0      | 92     | 0      | 0       | 0      |       |
|                   |                             | Pseudoflavonifractor capillosus ATCC 29799        | RG2                                | RG2                      | 29283  | 0      | 0       | 7213   | 36960  | 14422  | 0      | 3250   | 0       | 7676   |       |
|                   |                             | Faecalibacterium cf. prausnitzii KLE1255          | RG2                                | RG2                      | 0      | 0      | 0       | 0      | 108835 | 0      | 0      | 135186 | 0       | 157946 |       |
|                   |                             | Flavonifractor plautii ATCC 29863                 | RG2                                | RG2                      | 4124   | 2929   | 1446    | 2057   | 2456   | 1811   | 2929   | 787    | 96      | 38     |       |
|                   |                             | Clostridium botulinum                             | RG2                                | RG2                      | 0      | 0      | 0       | 0      | 0      | 0      | 0      | 0      | 0       | 0      |       |
|                   |                             | Clostridium butyricum                             | RG2                                | RG2                      | 61     | 48652  | 128     | 19443  | 34521  | 34147  | 48652  | 13549  | 26907   | 14672  |       |
|                   |                             | Clostridium cadaveris AGR2141                     | RG2                                | RG1                      | 0      | 1443   | 0       | 0      | 0      | 0      | 1443   | 0      | 0       | 0      |       |
|                   |                             | Clostridioides difficile 6534                     | RG2                                | RG2                      | 1287   | 1026   | 4998    | 772    | 0      | 1115   | 1026   | 833    | 2022    | 0      |       |
|                   |                             | Paeniclostridium sordellii                        | RG2                                | RG2                      | 0      | 191    | 0       | 388    | 0      | 0      | 191    | 371    | 0       | 0      |       |
|                   |                             | Peptostreptococcus anaerobius                     | RG2                                | RG2                      | 0      | 1116   | 0       | 0      | 0      | 0      | 1116   | 0      | 0       | 0      |       |
|                   |                             | Terrisporobacter glycolicus ATCC 14880 = DSM 1288 | RG2                                | RG2                      | 0      | 3992   | 0       | 3040   | 1607   | 0      | 3992   | 4502   | 0       | 0      |       |
|                   |                             | Clostridium orbiscindens 1_3_50AFAA               | RG2                                | RG2                      | 0      | 0      | 1006    | 0      | 914    | 0      | 0      | 0      | 0       | 798    |       |
|                   |                             | Clostridium perfringens C str. JGS1495            | RG2                                | RG2                      | 0      | 2094   | 98      | 496    | 204    | 0      | 2094   | 274    | 0       | 0      |       |
|                   |                             | Eubacterium ventriosum ATCC 27560                 | RG2                                | RG2                      | 0      | 0      | 0       | 0      | 0      | 0      | 0      | 0      | 0       | 3163   |       |
|                   |                             | Clostridium symbiosum                             | RG2                                | RG1                      | 0      | 0      | 0       | 0      | 0      | 0      | 0      | 0      | 0       | 13     |       |
|                   |                             | Catonella morbi ATCC 51271                        | RG2                                | RG1                      | 3523   | 0      | 0       | 0      | 0      | 0      | 0      | 0      | 0       | 0      |       |
|                   |                             | Actinobacteria                                    | Actinobacteria                     | Trueperella pyogenes TP8 | RG2    | RG2    | 0       | 1231   | 0      | 0      | 0      | 0      | 1231    | 0      | 0     |
|                   | Bifidobacterium sp. AGR2158 |                                                   |                                    | RG2                      | RG1    | 0      | 0       | 11062  | 0      | 0      | 0      | 0      | 0       | 0      | 0     |
|                   | Coriobacteriia              |                                                   | Olsenella uli                      | RG2                      | RG2    | 0      | 723     | 2160   | 988    | 0      | 0      | 723    | 0       | 0      | 0     |
|                   |                             |                                                   | Collinsella aerofaciens ATCC 25986 | RG2                      | RG1    | 0      | 0       | 0      | 31832  | 10960  | 0      | 0      | 16948   | 48193  | 16933 |
| Eggerthella lenta |                             |                                                   | RG2                                | RG2                      | 0      | 399    | 0       | 0      | 0      | 0      | 399    | 0      | 0       | 0      |       |
| Chlamydiae        | Chlamydiia                  | Chlamydia suis MD56                               | RG2                                | RG2                      | 0      | 80686  | 716     | 45601  | 64283  | 1293   | 80686  | 60192  | 1112    | 14308  |       |
|                   |                             | Chlamydia muridarum MopnTet14                     | RG1                                | RG2                      | 0      | 355    | 0       | 0      | 0      | 0      | 355    | 655    | 0       | 0      |       |
| Spirochaetes      | Spirochaetia                | Brachyspira murdochii DSM 12563                   | RG2                                | RG2                      | 0      | 0      | 0       | 0      | 0      | 0      | 0      | 0      | 4849    | 0      |       |
| Fusobacteria      | Fusobacteriia               | Fusobacterium varium ATCC 27725                   | RG2                                | RG2                      | 0      | 791    | 0       | 0      | 0      | 0      | 791    | 0      | 0       | 0      |       |
|                   |                             | Fusobacterium necrophorum                         | RG2                                | RG2                      | 0      | 6      | 0       | 0      | 0      | 0      | 6      | 0      | 0       | 0      |       |
| Total             |                             |                                                   |                                    |                          | 259793 | 479583 | 1206943 | 676912 | 440152 | 191065 | 479583 | 616381 | 2050840 | 405722 |       |

Table S3. Pathome – List of pathogens detected in manure.

| Phylum         | Class                   | Specie-Strain                                                                | RG Human | RG Animal | nonRWA Manure |        |        |        |        | RWA Manure |        |        |        |        |
|----------------|-------------------------|------------------------------------------------------------------------------|----------|-----------|---------------|--------|--------|--------|--------|------------|--------|--------|--------|--------|
|                |                         |                                                                              |          |           | Nov-18        | May-19 | Nov-19 | May-20 | Nov-20 | Nov-18     | May-19 | Nov-19 | May-20 | Nov-20 |
| Proteobacteria | <b>α-proteobacteria</b> | <i>Paracoccus sanguinis</i>                                                  | RG2      | RG2       | 1             | 0      | 0      | 0      | 0      | 411        | 0      | 0      | 0      | 65     |
|                | <b>γ-proteobacteria</b> | <i>Escherichia coli</i> O157:H7 str. 2011EL-2                                | RG3      | RG3       | 1             | 0      | 0      | 0      | 0      | 1          | 0      | 0      | 0      | 1221   |
|                |                         | <i>Acinetobacter baumannii</i> 573719                                        | RG2      | RG1       | 1             | 224    | 153    | 153    | 102    | 2182       | 224    | 0      | 26     | 32     |
|                |                         | <i>Acinetobacter johnsonii</i>                                               | RG1      | RG2       | 1             | 0      | 261    | 0      | 0      | 1          | 0      | 0      | 0      | 333    |
|                |                         | <i>Acinetobacter junii</i>                                                   | RG2      | RG2       | 1             | 0      | 0      | 0      | 0      | 1          | 0      | 0      | 0      | 24     |
|                |                         | <i>Actinobacillus minor</i>                                                  | RG2      | RG2       | 1             | 0      | 0      | 0      | 0      | 1          | 0      | 216    | 0      | 0      |
|                |                         | <i>Acinetobacter lwoffii</i> NCTC 5866 = CIP                                 | RG2      | RG1       | 1             | 0      | 0      | 0      | 830    | 1          | 0      | 0      | 0      | 1858   |
|                |                         | <i>Escherichia fergusonii</i>                                                | RG2      | RG2       | 1             | 0      | 684    | 0      | 0      | 1          | 0      | 0      | 0      | 0      |
|                |                         | <i>Proteus vulgaris</i>                                                      | RG2      | RG1       | 1             | 0      | 0      | 0      | 0      | 2214       | 0      | 0      | 0      | 0      |
|                |                         | <i>Proteus penneri</i> ATCC 35198                                            | RG2      | RG1       | 1             | 0      | 0      | 0      | 0      | 1977       | 0      | 0      | 0      | 0      |
|                |                         | <i>Providencia alcalifaciens</i>                                             | RG2      | RG1       | 1             | 0      | 0      | 0      | 0      | 1          | 0      | 0      | 0      | 15     |
|                |                         | <i>Providencia rettgeri</i>                                                  | RG2      | RG1       | 1             | 613    | 0      | 0      | 0      | 1419       | 613    | 30     | 0      | 0      |
|                |                         | <i>Pseudomonas aeruginosa</i>                                                | RG2      | RG2       | 1             | 45     | 0      | 0      | 73     | 5746       | 45     | 0      | 97     | 4841   |
|                |                         | <i>Psychrobacter phenylpyruvicus</i> DSM 7                                   | RG2      | RG1       | 1             | 1942   | 1580   | 0      | 2080   | 6537       | 1942   | 2005   | 0      | 0      |
|                |                         | <i>Leclercia adecarboxylata</i>                                              | RG2      | RG1       | 1             | 0      | 0      | 0      | 0      | 1          | 0      | 0      | 0      | 109    |
|                |                         | <i>Salmonella enterica</i> subsp. <i>enterica</i> serovar <i>Senftenberg</i> | RG2      | RG2       | 1             | 0      | 0      | 0      | 0      | 1          | 0      | 0      | 0      | 34     |
|                |                         | <i>Proteus mirabilis</i>                                                     | RG2      | RG2       | 1             | 0      | 0      | 0      | 0      | 3199       | 0      | 0      | 0      | 0      |
|                |                         | <i>Serratia liquefaciens</i>                                                 | RG1      | RG2       | 1             | 0      | 0      | 0      | 0      | 1          | 0      | 0      | 590    | 2692   |
|                |                         | <i>Serratia marcescens</i>                                                   | RG2      | RG2       | 1             | 0      | 0      | 0      | 0      | 1          | 0      | 0      | 184    | 1979   |
|                |                         | <i>Vibrio cholerae</i> CP1035(8)                                             | RG2      | RG1       | 1             | 0      | 0      | 0      | 0      | 323        | 0      | 0      | 192    | 216    |
|                |                         | <i>Yersinia enterocolitica</i>                                               | RG2      | RG2       | 1             | 0      | 22     | 0      | 0      | 1          | 0      | 0      | 0      | 0      |
|                | <b>β-proteobacteria</b> | <i>Sutterella wadsworthensis</i>                                             | RG2      | RG1       | 8             | 0      | 0      | 8      | 0      | 5          | 0      | 0      | 10     | 1489   |
|                |                         | <i>Oligella urethralis</i>                                                   | RG2      | RG1       | 1             | 0      | 0      | 0      | 0      | 477        | 0      | 0      | 0      | 0      |
|                |                         | <i>Comamonas aquatica</i>                                                    | RG2      | RG2       | 1             | 1249   | 0      | 0      | 0      | 1          | 1249   | 0      | 0      | 838    |
|                | <b>δproteobacteria</b>  | <i>Alcaligenes faecalis</i> subsp. <i>faecalis</i> NB                        | RG2      | RG2       | 1             | 16326  | 0      | 0      | 1280   | 11426      | 16326  | 5934   | 0      | 2330   |
|                |                         | <i>Bilophila wadsworthia</i> 3_1_6                                           | RG2      | RG2       | 1             | 0      | 0      | 0      | 0      | 1          | 0      | 1022   | 13142  | 0      |
|                | <b>εproteobacteria</b>  | <i>Arcobacter butzleri</i>                                                   | RG2      | RG2       | 128           | 23     | 307    | 198    | 406    | 56         | 23     | 56     | 545    | 1747   |
|                |                         | <i>Helicobacter bilis</i>                                                    | RG1      | RG2       | 1             | 0      | 0      | 0      | 0      | 1          | 0      | 0      | 0      | 180    |
|                |                         | <i>Campylobacter coli</i> BIGS0005                                           | RG2      | RG2       | 78            | 0      | 114    | 0      | 42     | 1          | 0      | 0      | 0      | 39     |
|                |                         | <i>Helicobacter rodentium</i> ATCC 700285                                    | RG1      | RG2       | 3325          | 0      | 1293   | 713    | 0      | 1          | 0      | 0      | 0      | 0      |
| Bacteroidetes  | <b>Bacteroidia</b>      | <i>Parabacteroides distasonis</i> str. 3999B                                 | RG2      | RG1       | 1357          | 1229   | 2393   | 0      | 1600   | 0          | 1229   | 200    | 276    | 459    |
|                |                         | <i>Porphyromonas asaccharolytica</i> DSM 17284                               | RG2      | RG2       | 653           | 0      | 595    | 613    | 1263   | 0          | 0      | 670    | 0      | 0      |
|                |                         | <i>Porphyromonas gulae</i>                                                   | RG1      | RG2       | 0             | 0      | 0      | 4566   | 9333   | 0          | 0      | 1133   | 0      | 1669   |
|                |                         | <i>Prevotella albensis</i> DSM 11370 = JCM 12120                             | RG2      | RG1       | 0             | 2109   | 0      | 0      | 0      | 0          | 2109   | 0      | 0      | 0      |
|                |                         | <i>Prevotella bivia</i>                                                      | RG2      | RG2       | 458           | 918    | 723    | 0      | 694    | 0          | 918    | 0      | 0      | 0      |
|                |                         | <i>Prevotella melaninogenica</i> DNF00666                                    | RG2      | RG2       | 1872          | 1860   | 2659   | 0      | 5243   | 0          | 1860   | 2187   | 0      | 0      |
|                |                         | <i>Bacteroides caccae</i> ATCC 43185                                         | RG2      | RG2       | 0             | 0      | 0      | 0      | 0      | 0          | 0      | 0      | 1128   | 885    |
|                |                         | <i>Bacteroides pyogenes</i> DSM 20611 = JCM 12120                            | RG1      | RG2       | 106           | 2156   | 333    | 127    | 268    | 107        | 2156   | 1594   | 316    | 152    |
|                |                         | <i>Prevotella brevis</i> ATCC 19188                                          | RG2      | RG1       | 810           | 1957   | 1126   | 0      | 556    | 0          | 1957   | 470    | 298    | 1109   |
|                |                         | <i>Prevotella bergensis</i> DSM 17361                                        | RG2      | RG2       | 0             | 0      | 0      | 0      | 0      | 0          | 0      | 4498   | 0      | 0      |
|                |                         | <i>Prevotella multisaccharivorax</i> DSM 17284                               | RG2      | RG2       | 0             | 0      | 0      | 0      | 5568   | 0          | 0      | 0      | 0      | 0      |
|                |                         | <i>Odoribacter splanchnicus</i> DSM 20712                                    | RG2      | RG1       | 0             | 0      | 0      | 0      | 0      | 0          | 0      | 5321   | 6342   | 0      |
|                |                         | <i>Sanguibacteroides justesenii</i>                                          | RG2      | RG2       | 0             | 0      | 0      | 0      | 0      | 0          | 0      | 1717   | 533    | 0      |
|                |                         | <i>Bacteroides fragilis</i> HMW 615                                          | RG2      | RG2       | 1672          | 1431   | 1639   | 865    | 1011   | 499        | 1431   | 665    | 8225   | 737    |
|                |                         | <i>Prevotella bryantii</i>                                                   | RG2      | RG1       | 623           | 568    | 870    | 220    | 776    | 0          | 568    | 314    | 0      | 173    |
|                |                         | <i>Prevotella salivae</i> F0493                                              | RG2      | RG1       | 0             | 2328   | 0      | 0      | 0      | 0          | 2328   | 0      | 0      | 0      |
|                |                         | <i>Bacteroides nordii</i> WAL 11050 = JCM 12120                              | RG2      | RG2       | 702           | 1350   | 871    | 0      | 0      | 0          | 1350   | 0      | 0      | 0      |

|            |                        |                                         |                              |      |        |       |       |       |       |       |       |       |       |       |
|------------|------------------------|-----------------------------------------|------------------------------|------|--------|-------|-------|-------|-------|-------|-------|-------|-------|-------|
|            |                        | Bacteroides ovatus SD CMC 3f            | RG2                          | RG2  | 0      | 0     | 0     | 0     | 4758  | 0     | 0     | 1361  | 645   | 2398  |
|            |                        | Bacteroides uniformis ATCC 8492         | RG2                          | RG1  | 1006   | 843   | 418   | 279   | 901   | 115   | 843   | 163   | 136   | 254   |
|            |                        | Bacteroides eggerthii                   | RG2                          | RG1  | 0      | 0     | 0     | 0     | 0     | 0     | 0     | 0     | 0     | 1552  |
|            | Flavobacteriia         | Myroides odoratimimus CCUG 12901        | RG2                          | RG1  | 0      | 0     | 0     | 0     | 0     | 1077  | 0     | 251   | 29    | 0     |
|            |                        | Myroides odoratus                       | RG2                          | RG1  | 0      | 0     | 0     | 0     | 0     | 0     | 0     | 0     | 0     | 1079  |
|            |                        | Empedobacter falsenii                   | RG2                          | RG1  | 0      | 0     | 0     | 0     | 1287  | 0     | 0     | 0     | 0     | 5030  |
|            |                        | Empedobacter brevis NBRC 14943 = A      | RG2                          | RG2  | 0      | 1991  | 0     | 0     | 0     | 0     | 1991  | 0     | 0     | 0     |
|            |                        |                                         |                              |      |        |       |       |       |       |       |       |       |       |       |
| Firmicutes | Negativicutes          | Megasphaera elsdenii                    | RG2                          | RG1  | 19522  | 23007 | 36687 | 24104 | 0     | 3431  | 23007 | 15957 | 5449  | 0     |
|            |                        | Bacteroides nordii                      | RG2                          | RG1  | 3218   | 0     | 0     | 0     | 0     | 0     | 0     | 0     | 0     | 0     |
|            |                        | Acidaminococcus fermentans DSM 20       | RG2                          | RG1  | 119072 | 20696 | 60000 | 55789 | 35881 | 4666  | 20696 | 33222 | 76082 | 5756  |
|            |                        | Mitsuokella jalaludinii DSM 13811       | RG2                          | RG2  | 36676  | 0     | 0     | 0     | 0     | 0     | 0     | 0     | 0     | 0     |
|            |                        | Mitsuokella multacida DSM 20544         | RG2                          | RG2  | 6268   | 9081  | 9381  | 4513  | 10267 | 6027  | 9081  | 6791  | 10395 | 5255  |
|            |                        | Acidaminococcus intestini RyC-MR95      | RG2                          | RG1  | 0      | 0     | 0     | 0     | 0     | 0     | 0     | 0     | 0     | 6617  |
|            | Bacilli                | Aerococcus viridans LL1                 | RG2                          | RG2  | 11347  | 18548 | 20569 | 35642 | 11567 | 4806  | 18548 | 1633  | 3485  | 533   |
|            |                        | Bacillus cereus                         | RG2                          | RG2  | 0      | 0     | 0     | 0     | 0     | 4     | 0     | 0     | 0     | 0     |
|            |                        | Enterococcus faecium                    | RG2                          | RG1  | 1295   | 570   | 218   | 188   | 311   | 86    | 570   | 183   | 2464  | 15    |
|            |                        | Enterococcus faecalis EnGen0413         | RG2                          | RG2  | 1859   | 171   | 707   | 503   | 663   | 546   | 171   | 278   | 119   | 204   |
|            |                        | Enterococcus hirae ATCC 9790            | RG2                          | RG2  | 0      | 573   | 0     | 120   | 176   | 0     | 573   | 0     | 412   | 0     |
|            |                        | Jeotgalicoccus sauidmassiliensis        | RG2                          | RG2  | 0      | 0     | 0     | 0     | 0     | 0     | 0     | 0     | 0     | 0     |
|            |                        | Lactobacillus crispatus EM-LC1          | RG2                          | RG2  | 68     | 0     | 0     | 0     | 0     | 0     | 0     | 0     | 0     | 0     |
|            |                        | Lactococcus garvieae                    | RG1                          | RG2  | 0      | 176   | 0     | 0     | 209   | 353   | 176   | 198   | 41    | 0     |
|            |                        | Listeria monocytogenes FSL F2-515       | RG2                          | RG2  | 0      | 0     | 335   | 0     | 191   | 0     | 0     | 0     | 0     | 0     |
|            |                        | Staphylococcus aureus                   | RG2                          | RG2  | 0      | 0     | 0     | 0     | 27    | 0     | 0     | 14    | 0     | 0     |
|            |                        | Staphylococcus simulans                 | RG2                          | RG2  | 0      | 2086  | 0     | 0     | 0     | 0     | 2086  | 0     | 0     | 0     |
|            |                        | Streptococcus gallolyticus subsp. gallo | RG2                          | RG2  | 107    | 4596  | 3235  | 104   | 237   | 1371  | 4596  | 3609  | 1269  | 58    |
|            |                        | Streptococcus equinus JB1               | RG2                          | RG2  | 25     | 2652  | 5717  | 3855  | 3533  | 3250  | 2652  | 8131  | 3388  | 7     |
|            |                        | Streptococcus equi subsp. zooepidemi    | RG2                          | RG2  | 0      | 1208  | 0     | 0     | 0     | 0     | 1208  | 39    | 0     | 0     |
|            |                        | Streptococcus agalactiae                | RG2                          | RG2  | 0      | 29    | 25    | 10    | 37    | 0     | 29    | 22    | 0     | 0     |
|            |                        | Streptococcus infantarius subsp. infan  | RG1                          | RG2  | 922    | 2562  | 2937  | 2225  | 762   | 919   | 2562  | 2362  | 19596 | 721   |
|            |                        | Streptococcus lutetiensis 033           | RG2                          | RG2  | 6811   | 25889 | 24944 | 18089 | 13213 | 10844 | 25889 | 7639  | 7682  | 3517  |
|            |                        | Streptococcus parauberis                | RG1                          | RG2  | 516    | 790   | 213   | 173   | 227   | 0     | 790   | 0     | 0     | 0     |
|            |                        | Streptococcus salivarius SK126          | RG2                          | RG1  | 0      | 0     | 0     | 0     | 544   | 0     | 0     | 0     | 0     | 0     |
|            |                        | Streptococcus pasteurianus ATCC 431     | RG2                          | RG2  | 0      | 648   | 695   | 672   | 606   | 335   | 648   | 509   | 350   | 0     |
|            | Streptococcus suis GZ1 | RG2                                     | RG2                          | 2026 | 1558   | 1711  | 1107  | 1360  | 734   | 1558  | 3867  | 744   | 3344  |       |
|            | Tissierellia           | Anaerococcus prevotii                   | RG1                          | RG2  | 9      | 49    | 1576  | 1009  | 52    | 0     | 49    | 1514  | 94    | 0     |
|            |                        | Finegoldia magna                        | RG2                          | RG2  | 43     | 339   | 312   | 94    | 197   | 246   | 339   | 47    | 0     | 0     |
|            | Erysipelotrichia       | Erysipelothrix rhusiopathiae            | RG2                          | RG2  | 0      | 236   | 0     | 0     | 97    | 0     | 236   | 1071  | 0     | 0     |
|            |                        | Erysipelothrix tonsillarum DSM 14972    | RG2                          | RG1  | 8249   | 9335  | 9528  | 8555  | 5809  | 3459  | 9335  | 10383 | 3267  | 0     |
|            | Clostridia             | Faecalibacterium cf. prausnitzii KLE12  | RG2                          | RG2  | 0      | 0     | 0     | 0     | 23087 | 0     | 0     | 0     | 0     | 11351 |
|            |                        | Flavonifractor plautii ATCC 29863       | RG2                          | RG2  | 0      | 0     | 25    | 0     | 32    | 0     | 0     | 30    | 21    | 0     |
|            |                        | Intestinibacter bartlettii DSM 16795    | RG2                          | RG1  | 1400   | 0     | 0     | 0     | 3909  | 0     | 0     | 0     | 0     | 0     |
|            |                        | Clostridium baratii str. Sullivan       | RG2                          | RG2  | 0      | 17248 | 0     | 0     | 0     | 1555  | 17248 | 3879  | 3260  | 1961  |
|            |                        | Clostridium botulinum                   | RG2                          | RG2  | 0      | 600   | 0     | 0     | 25    | 1778  | 600   | 119   | 1267  | 47    |
|            |                        | Clostridium butyricum                   | RG2                          | RG2  | 210    | 2687  | 3295  | 1559  | 1107  | 1395  | 2687  | 1478  | 7254  | 105   |
|            |                        | Clostridioides difficile 6534           | RG2                          | RG2  | 532    | 101   | 0     | 17    | 19    | 35    | 101   | 12    | 2245  | 0     |
|            |                        | Paenibacillus sordellii                 | RG2                          | RG2  | 0      | 2163  | 687   | 1951  | 0     | 0     | 2163  | 501   | 1507  | 0     |
|            |                        | Paraclostridium bifermentans            | RG2                          | RG2  | 0      | 92    | 0     | 0     | 0     | 0     | 92    | 0     | 0     | 0     |
|            |                        | Terrisporobacter glycolicus ATCC 1488   | RG2                          | RG2  | 0      | 23864 | 5179  | 5563  | 6624  | 6399  | 23864 | 3902  | 13999 | 0     |
|            |                        |                                         | Terrisporobacter othiniensis | RG2  | RG2    | 0     | 0     | 5151  | 12020 | 0     | 0     | 0     | 333   | 0     |

|                |                       |                                        |     |     |        |        |        |        |        |        |        |        |        |        |
|----------------|-----------------------|----------------------------------------|-----|-----|--------|--------|--------|--------|--------|--------|--------|--------|--------|--------|
|                |                       | Clostridium paraputrificum AGR2156     | RG2 | RG1 | 0      | 3195   | 0      | 0      | 0      | 0      | 3195   | 0      | 0      | 0      |
|                |                       | Clostridium perfringens C str. JGS1495 | RG2 | RG2 | 95     | 9106   | 1075   | 1321   | 2587   | 1135   | 9106   | 1417   | 3609   | 870    |
|                |                       | Clostridium novyi A str. 4552          | RG2 | RG2 | 1847   | 5401   | 3591   | 3369   | 0      | 0      | 5401   | 2214   | 3431   | 0      |
|                |                       | Clostridium tetani                     | RG2 | RG2 | 261    | 430    | 596    | 468    | 31     | 448    | 430    | 34     | 26     | 336    |
|                |                       | [Clostridium] clostridioforme          | RG2 | RG1 | 0      | 0      | 0      | 0      | 664    | 0      | 0      | 0      | 0      | 88     |
| Actinobacteria | Actinobacteria        | Trueperella pyogenes TP8               | RG2 | RG2 | 0      | 0      | 0      | 0      | 434    | 0      | 0      | 0      | 0      | 0      |
|                |                       | Corynebacterium pilosum DSM 20521      | RG2 | RG2 | 0      | 6515   | 0      | 1285   | 0      | 5163   | 6515   | 0      | 0      | 0      |
|                |                       | Corynebacterium freneyi DNF00450       | RG2 | RG2 | 0      | 34751  | 1773   | 2609   | 28124  | 29262  | 34751  | 14837  | 43128  | 31525  |
|                |                       | Corynebacterium urealyticum            | RG2 | RG2 | 0      | 2318   | 0      | 0      | 1283   | 2690   | 2318   | 1075   | 0      | 351    |
|                |                       | Dietzia cinnamea P4                    | RG2 | RG1 | 0      | 1431   | 0      | 0      | 0      | 0      | 1431   | 0      | 0      | 0      |
|                |                       | Mycobacterium avium subsp. avium E     | RG2 | RG2 | 0      | 0      | 0      | 0      | 0      | 1965   | 0      | 0      | 0      | 0      |
|                |                       | Corynebacterium jeikeium               | RG2 | RG1 | 0      | 0      | 0      | 0      | 0      | 0      | 0      | 0      | 0      | 56     |
|                | Coriobacteriia        | Atopobium vaginae                      | RG2 | RG1 | 0      | 21     | 0      | 0      | 0      | 0      | 21     | 0      | 0      | 0      |
|                |                       | Collinsella aerofaciens ATCC 25986     | RG2 | RG1 | 0      | 8952   | 0      | 0      | 11750  | 0      | 8952   | 3808   | 0      | 5412   |
|                |                       | Eggerthella lenta                      | RG2 | RG2 | 0      | 472    | 0      | 155    | 209    | 0      | 472    | 0      | 0      | 0      |
| Cyanobacteria  | Oscillatoriothycideae | Planktothrix agardhii NIVA-CYA 126/8   | RG2 | RG1 | 0      | 646    | 0      | 0      | 0      | 0      | 646    | 0      | 0      | 0      |
| Chlamydiae     | Chlamydiia            | Chlamydia suis MD56                    | RG2 | RG2 | 3052   | 2195   | 3768   | 1097   | 1806   | 670    | 2195   | 5516   | 660    | 4119   |
| Synergistetes  | Synergistia           | Pyramidobacter piscolens W5455         | RG2 | RG1 | 0      | 0      | 0      | 0      | 0      | 0      | 0      | 36623  | 9003   | 1136   |
| Tenericutes    | Mollicutes            | Acholeplasma laidlawii PG-8A           | RG1 | RG2 | 4431   | 0      | 3425   | 3484   | 2054   | 2184   | 0      | 1843   | 4042   | 2169   |
|                |                       | Acholeplasma hippikon ATCC 29725       | RG1 | RG2 | 3046   | 0      | 0      | 0      | 0      | 0      | 0      | 0      | 0      | 0      |
|                |                       | Acholeplasma equifetale ATCC 29724     | RG1 | RG2 | 4723   | 0      | 2180   | 0      | 0      | 2391   | 0      | 0      | 0      | 0      |
|                |                       | Acholeplasma modicum ATCC 29102        | RG1 | RG2 | 0      | 0      | 0      | 0      | 13236  | 0      | 0      | 0      | 0      | 3508   |
|                |                       | Acholeplasma axanthum ATCC 25176       | RG1 | RG2 | 21874  | 1684   | 8077   | 9605   | 7369   | 10167  | 1684   | 8158   | 13333  | 2388   |
| Spirochaetes   | Spirochaetia          | Brachyspira murdochii DSM 12563        | RG2 | RG1 | 0      | 0      | 0      | 0      | 0      | 0      | 0      | 0      | 0      | 679    |
| Fusobacteria   | Fusobacteriia         | Fusobacterium necrophorum              | RG2 | RG2 | 0      | 0      | 0      | 0      | 0      | 0      | 0      | 0      | 0      | 0      |
|                |                       | Fusobacterium ulcerans                 | RG2 | RG2 | 0      | 752    | 586    | 0      | 486    | 0      | 752    | 1164   | 0      | 1019   |
| Total          |                       |                                        |     |     | 272292 | 288571 | 234228 | 208990 | 228857 | 145052 | 288571 | 213871 | 274659 | 128671 |
